# Supplementary material
Source: PubMed Central journal article supplement (PMC1422172)
Supplement: 7601029s1.pdf [file 7601029s1.pdf]

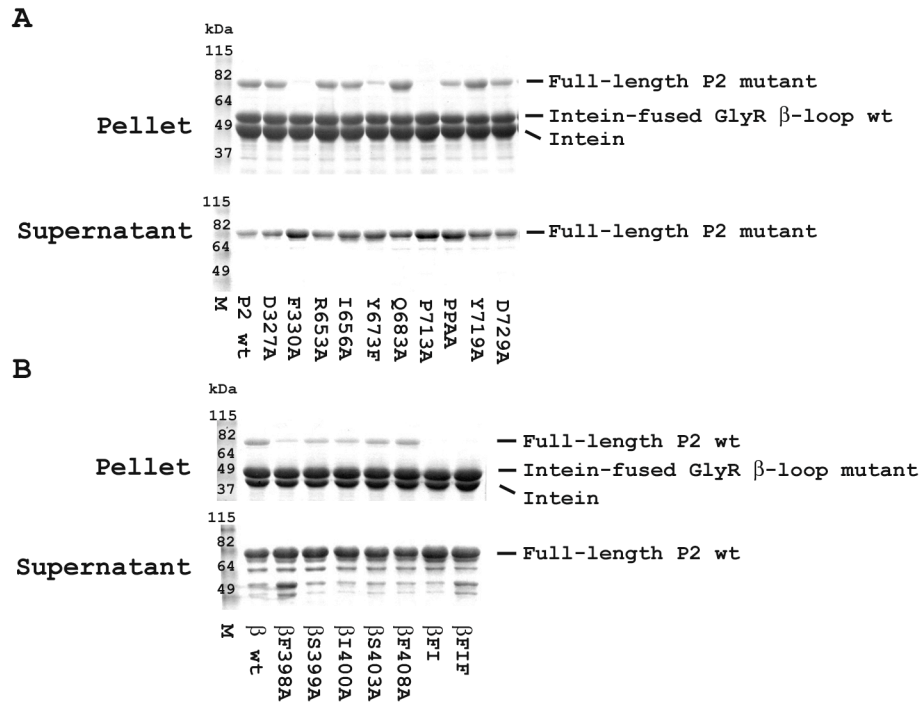

**Supplementary Figure S1** Pull-down assays with full-length gephyrin P2 and GlyR  $\beta$ -loop mutants

(A) Various P2 variants including WT P2 were purified and co-precipitated with WT GlyR  $\beta$ -loop beads. Bound protein in the pellet (upper panel) and unbound protein in the supernatant (lower panel) protein were subjected to SDS-PAGE analysis. The lane labeled M contains a molecular weight standard.

(B) Co-sedimentation of WT P2 with various GlyR  $\beta$ -loop variants immobilized to the beads.

**Supplementary Table I.** ITC parameters of Geph-E, P2 and GlyR  $\beta$ -loop mutants

| Geph-E   | N1                | K <sub>d1</sub><br>( $\mu$ M) | $\Delta$ H1<br>(kcal/mol) | N2                | K <sub>d2</sub><br>( $\mu$ M) | $\Delta$ H2<br>(kcal/mol) |
|----------|-------------------|-------------------------------|---------------------------|-------------------|-------------------------------|---------------------------|
| WT       | 0.64              | 0.12                          | -16.1                     | 0.65              | 7.8                           | -6.6                      |
| F330A    | 0.64              | 9.2                           | -10.3                     | n.a. <sup>a</sup> | n.a.                          | n.a.                      |
| PPAA     | 1.3               | 12.4                          | -12.7                     | n.a.              | n.a.                          | n.a.                      |
| P713E    | n.d. <sup>b</sup> | n.d.                          | n.d.                      | n.d.              | n.d.                          | n.d.                      |
| P2 wt    | 0.35              | 0.09                          | -18.4                     | 0.45              | 15.6                          | -8.3                      |
| P2 Y673F | 0.31              | 7.4                           | -22.2                     | n.a.              | n.a.                          | n.a.                      |

  

| GlyR $\beta$ -loop | N1   | K <sub>d1</sub><br>( $\mu$ M) | $\Delta$ H1<br>(kcal/mol) | N2   | K <sub>d2</sub><br>( $\mu$ M) | $\Delta$ H2<br>(kcal/mol) |
|--------------------|------|-------------------------------|---------------------------|------|-------------------------------|---------------------------|
| $\beta$ WT         | 0.64 | 0.12                          | -16.1                     | 0.65 | 7.8                           | -6.6                      |
| $\beta$ F398A      | 0.82 | 14.2                          | -9.11                     | n.a. | n.a.                          | n.a.                      |
| $\beta$ S399A      | 0.49 | 1.95                          | -18.3                     | n.a. | n.a.                          | n.a.                      |
| $\beta$ I400A      | 0.42 | 2.63                          | -21.2                     | n.a. | n.a.                          | n.a.                      |
| $\beta$ FI         | n.d. | n.d.                          | n.d.                      | n.d. | n.d.                          | n.d.                      |
| $\beta$ FIF        | n.d. | n.d.                          | n.d.                      | n.d. | n.d.                          | n.d.                      |

<sup>a</sup>In case the binding isotherms could be fitted with a single binding site the values for the second site are non-applicable (n.a.), <sup>b</sup>whereas experiments where binding could not be detected have been labeled n.d. (not-detectable).

## Supplementary materials and methods

### Cloning, site directed mutagenesis, protein expression and purification

For recombinant expression in *E. coli*, the sequence encoding the E-domain of rat gephyrin (residues 318-736) was amplified by PCR from the gephyrin cDNA and cloned into the SapI/PstI restriction sites of the pTWIN1 vector (New England Biolabs). Point mutations were introduced into Geph-E (pTWIN1-E<sub>318-736</sub>), full-length gephyrin (splice variant P2, pQE30-P2) and the GlyR  $\beta$ -loop (pTYB2-b49) using the QuikChange® site-directed mutagenesis kit (Stratagene). For GFP-fused gephyrin variants, PCR amplified EcoRI/SalI fragments from pQE30-P2 plasmids with corresponding mutation were cloned into pEGFP-C2 vector. In a similar way, DsRed-tagged GlyR  $\beta$ -loop variants were PCR amplified from pTYB2-b49 variant constructs and inserted into BamHI/KpnI sites of pDsRed-N1 vector. Protein expression and purification of Geph-E and the GlyR  $\beta$ -loop followed the protocol described previously (Schrader et al., 2004). Selenomethionine (SeMet) substituted Geph-E was produced according to the feedback inhibition method (Doublé, 1997). Cells were grown at 37° C in M9 minimal medium composed of 48 mM Na<sub>2</sub>HPO<sub>4</sub>, 22 mM KH<sub>2</sub>PO<sub>4</sub>, 8.6 mM NaCl, 18.7 mM NH<sub>4</sub>Cl, 0.4% glucose, 2 mM MgSO<sub>4</sub>, and 0.1 mM CaCl<sub>2</sub>. At an OD<sub>600</sub> of 0.4, the amino acids lysine (0.1 mg/ml), phenylalanine (0.1 mg/ml), threonine (0.1 mg/ml), leucine (0.05 mg/ml), valine (0.05 mg/ml) and selenomethionine (0.05 mg/ml) were added. The culture was incubated at 37° C for 15 minutes, cooled down to 30° C, induced with 0.5 mM IPTG and incubated overnight. Purification of SeMet-substituted Geph-E and Geph-E variants was performed according to the same protocol utilized for non-substituted Geph-E (Schrader et al., 2004).

### Supplementary references

Doublé S. (1997) Preparation of selenomethionyl proteins for phase determination. *Methods in enzymology* **276**: 523-530

Schrader N, Kim EY, Winking J, Paulukat J, Schindelin H and Schwarz G. (2004) Biochemical characterization of the high affinity binding between the glycine receptor and gephyrin. *J Biol Chem* **279**: 18733-18741
